# Supplementary material for: In-depth hepatoprotective mechanistic study of Phyllanthus niruri: In vitro and in vivo studies and its chemical characterization
Source: PLoS One. 2020 Jan 15;15(1):e0226185. doi: 10.1371/journal.pone.0226185 (PMC6961881; doi:10.1371/journal.pone.0226185)

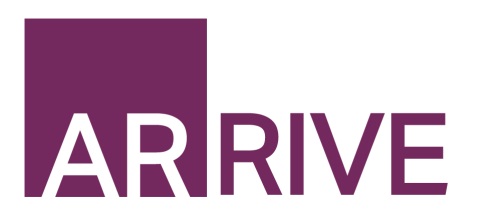


The ARRIVE Guidelines Checklist

Animal Research: Reporting In Vivo Experiments

Carol Kilkenny1, William J Browne2, Innes C Cuthill3, Michael Emerson4 and Douglas G Altman5

*1The National Centre for the Replacement, Refinement and Reduction of Animals in Research, London, UK, 2School of Veterinary Science, University of Bristol, Bristol, UK, 3School of Biological Sciences, University of Bristol, Bristol, UK, 4National Heart and Lung Institute, Imperial College London, UK, 5Centre for Statistics in Medicine, University of Oxford, Oxford, UK.*

|  | | ITEM | RECOMMENDATION | Section/ Paragraph |
| --- | --- | --- | --- | --- |
| 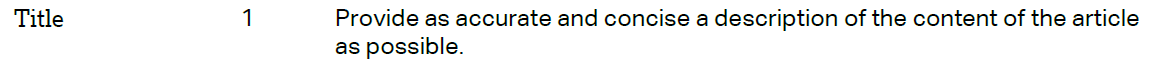 | | | Section 1 |
| 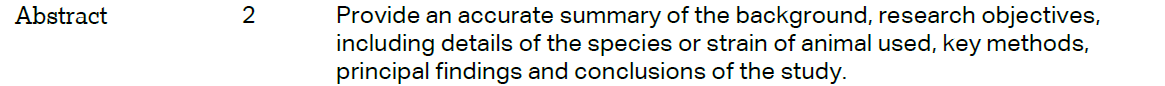 | | | Section 2 |
| INTRODUCTION | | |  |
| 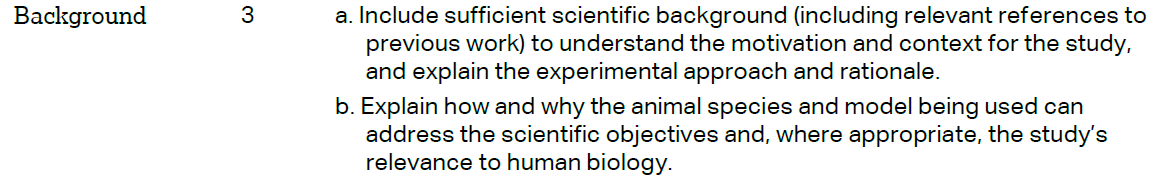 | | | Section 3 Pargraph 1,2 |
| 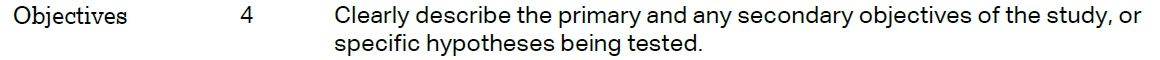 | | | Section 3 Paragraph 3 |
| METHODS | | |  |
| 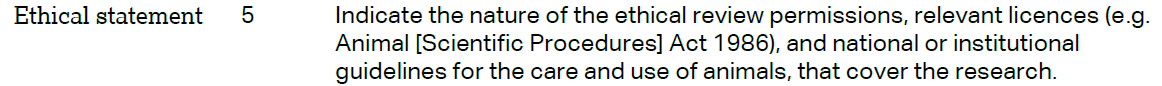 | | | Section 4 Paragraph 15 |
| 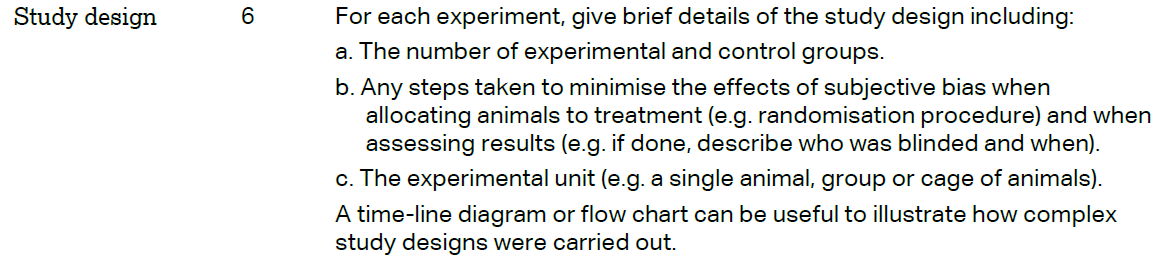 | | | Section 4 Paragraph 17 |
| 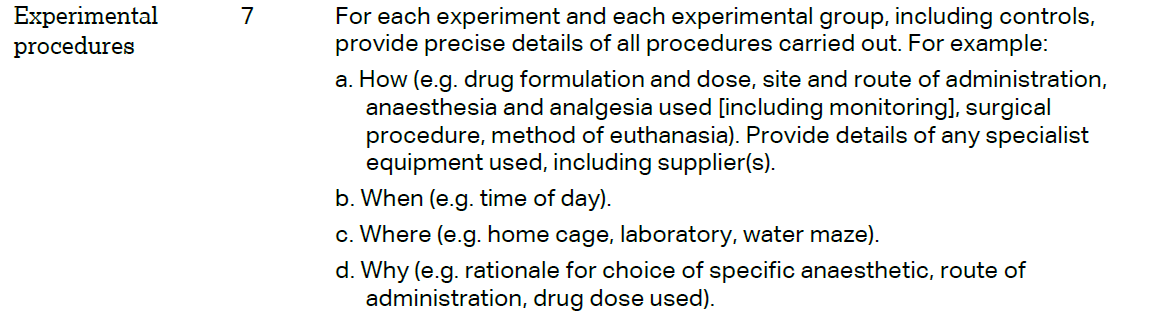 | | | Section 4 Paragraph 17 |
| 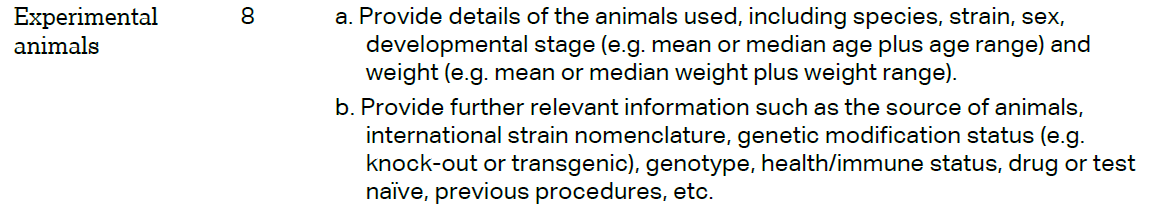 | | | Section 4 Paragraph 15 |

The ARRIVE guidelines. Originally published in *PLoS Biology*, June 20101

| 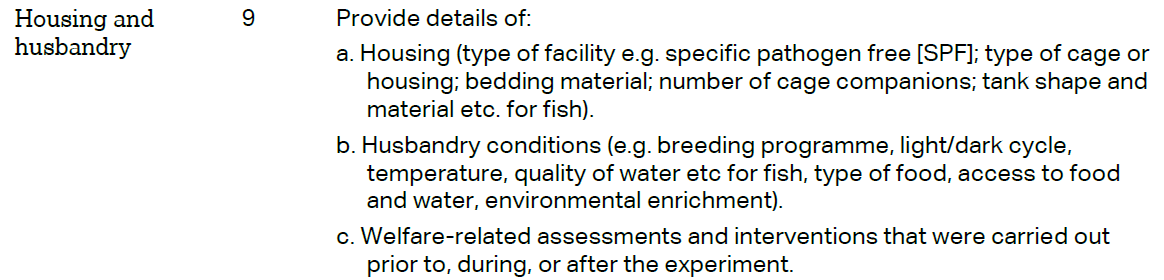 | Section 4 Paragraph 15 | |
| --- | --- | --- |
| 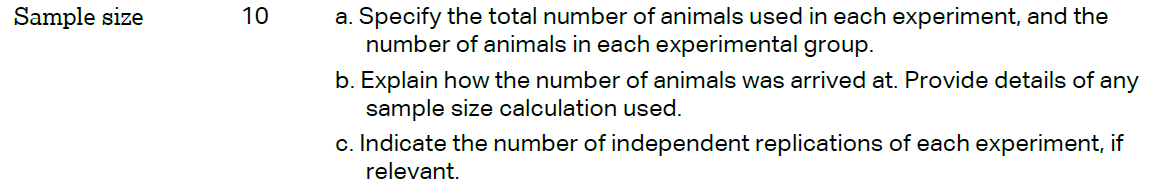 | Section 4 Paragraph 17 | |
| 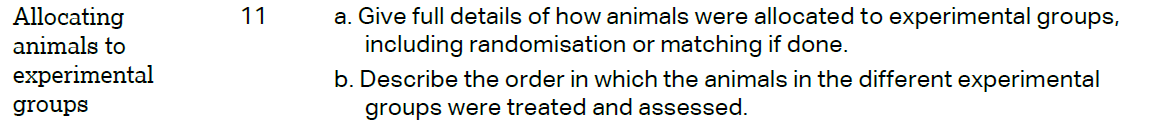 | Section 4 Paragraph 17 | |
| 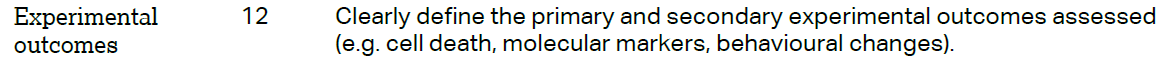 | Section 4 Paragraph 18-25 | |
| 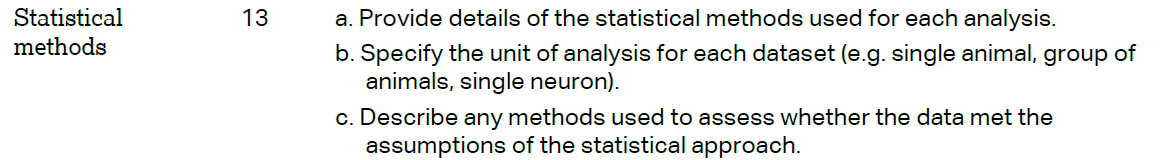 | Section 4 Paragraph 26 | |
| RESULTS |  | |
| 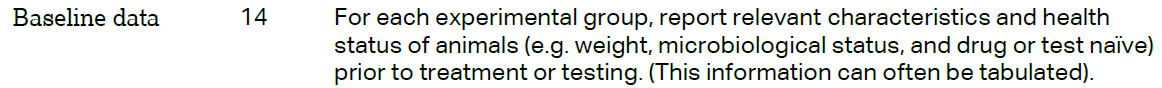 | Section 5 Paragraph 6 | |
| 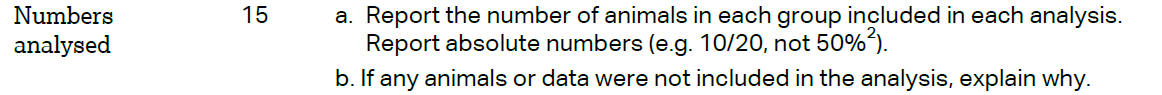 | Section 5 Paragraph 7-11 | |
| 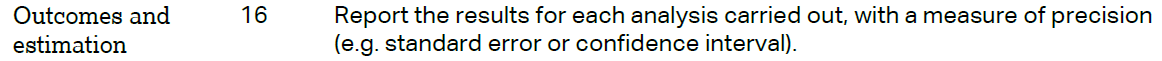 | Section 5 Paragraph 7-11 | |
| 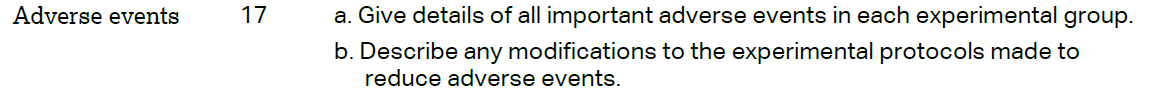 | Section 5 Paragraph 7-11 | |
| DISCUSSION |  | |
| 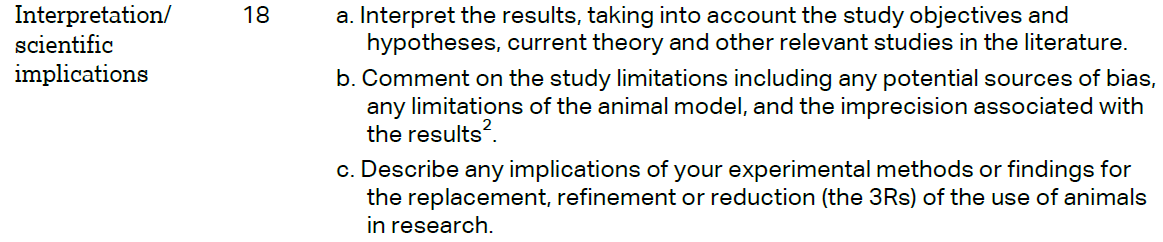 | Section 5 | |
| 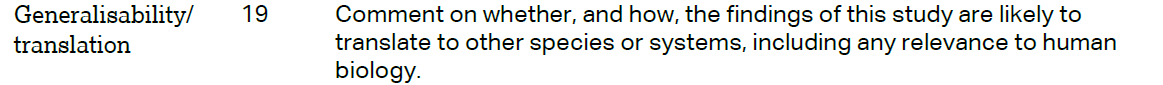 | Section 6 | |
| 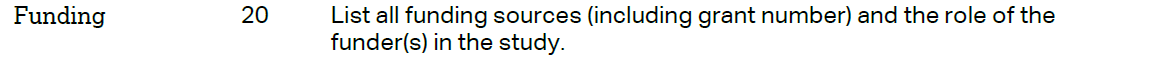 | | Section 11 |


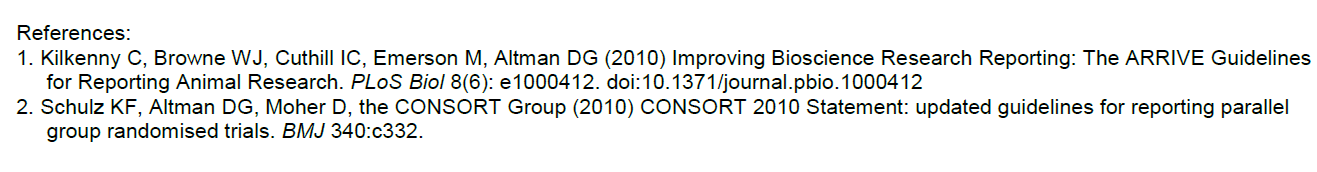

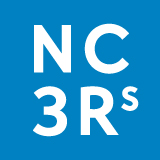

Supplement: S1 Checklist — (DOCX) [file pone.0226185.s001.docx]
